# Supplementary material for: Seismic reflection data reveal the 3D structure of the newly discovered Exmouth Dyke Swarm, offshore NW Australia
Source: Copernicus journal article supplement (doi:10.5194/se-11-579-2020), 2020-04-22
Supplement: Supplementary file 6 [file se-11-579-2020-supplement.zip]

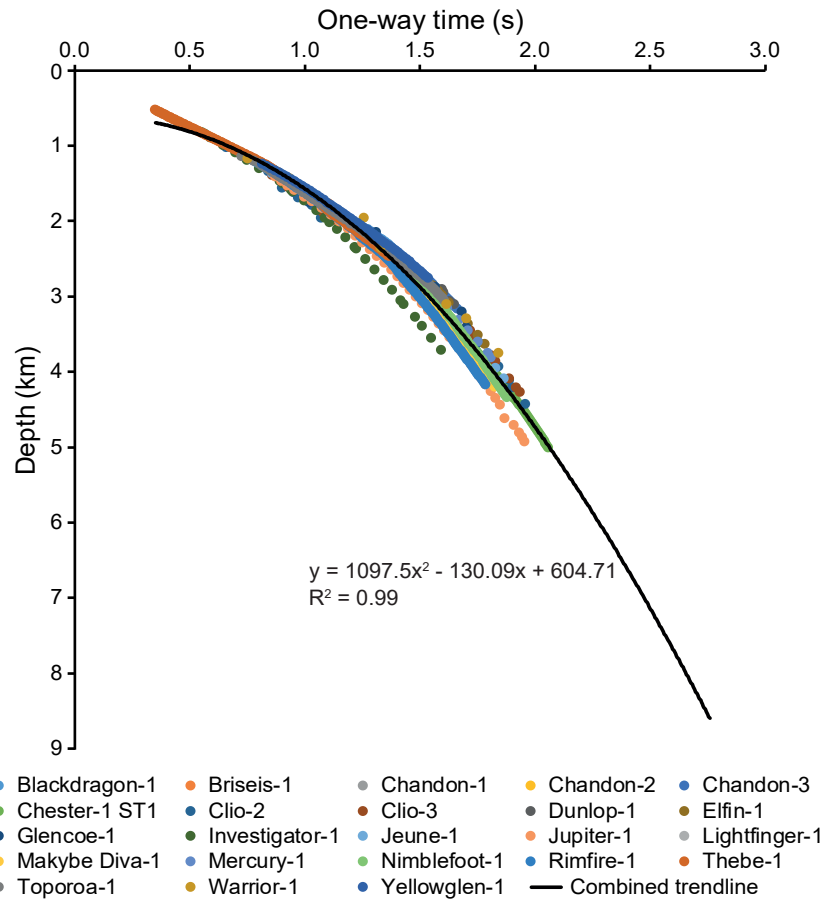

Supplementary Figure S3: Time-depth data for the 24 wells used in the study. Fitting a second-order polynomial trend-line through the cumulative data, and extrapolating it downwards, allows us to define seismic velocities at any depth.
