# Supplementary material for: Seismic reflection data reveal the 3D structure of the newly discovered Exmouth Dyke Swarm, offshore NW Australia
Source: Copernicus journal article supplement (doi:10.5194/se-11-579-2020), 2020-04-22
Supplement: Supplementary file 7 [file se-11-579-2020-supplement.zip]

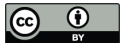

## *Supplement of*

# **Seismic reflection data reveal the 3D structure of the newly discovered Exmouth Dyke Swarm, offshore NW Australia**

**Craig Magee and Christopher Aiden-Lee Jackson**

*Correspondence to:* Craig Magee (c.magee@leeds.ac.uk)

- [se-11-579-2020-supplement-title-page.pdf](#)
- Supplementary material
  - [Sup. Fig. 1 - Enlarged Fig 3c.pdf](#)
  - [Sup. Fig. 1 - Well labels.pdf](#)
  - [Sup. Fig. 2 - Figure 5 uninterp.pdf](#)
  - [Sup. Fig. 2 - Well labels.pdf](#)
  - [Sup. Fig. 3 - Figure 5 uninterp.pdf](#)
  - [Sup. Fig. 3 - Time-depth plot.pdf](#)
  - [Sup. Fig. 4 - Figure 6 uninterp.pdf](#)
  - [Sup. Fig. 4 - Time-depth plot.pdf](#)
  - [Sup. Fig. 5 - Figure 6 uninterp.pdf](#)
  - [Sup. Fig. 5 - Figure 7 uninterp.pdf](#)
  - [Sup. Fig. 6 - Figure 7 uninterp.pdf](#)
  - [Sup. Fig. 6 - Figure 9A-C uninterp.pdf](#)
  - [Sup. Fig. 7 - Figure 9A-C uninterp.pdf](#)
  - [Sup. Table S1 - survey details.xlsx](#)
  - [Sup. Table S1 - well time-depth.xlsx](#)
  - [Sup. Table S3 - VZD segments.xlsx](#)
  - [Sup. Table S4 - transect data.xlsx](#)

The copyright of individual parts of the supplement might differ from the CC BY 4.0 License.
