# Supplementary figures and images for: Seismic reflection data reveal the 3D structure of the newly discovered Exmouth Dyke Swarm, offshore NW Australia
Source: Copernicus journal article supplement (doi:10.5194/se-11-579-2020), 2020-04-22

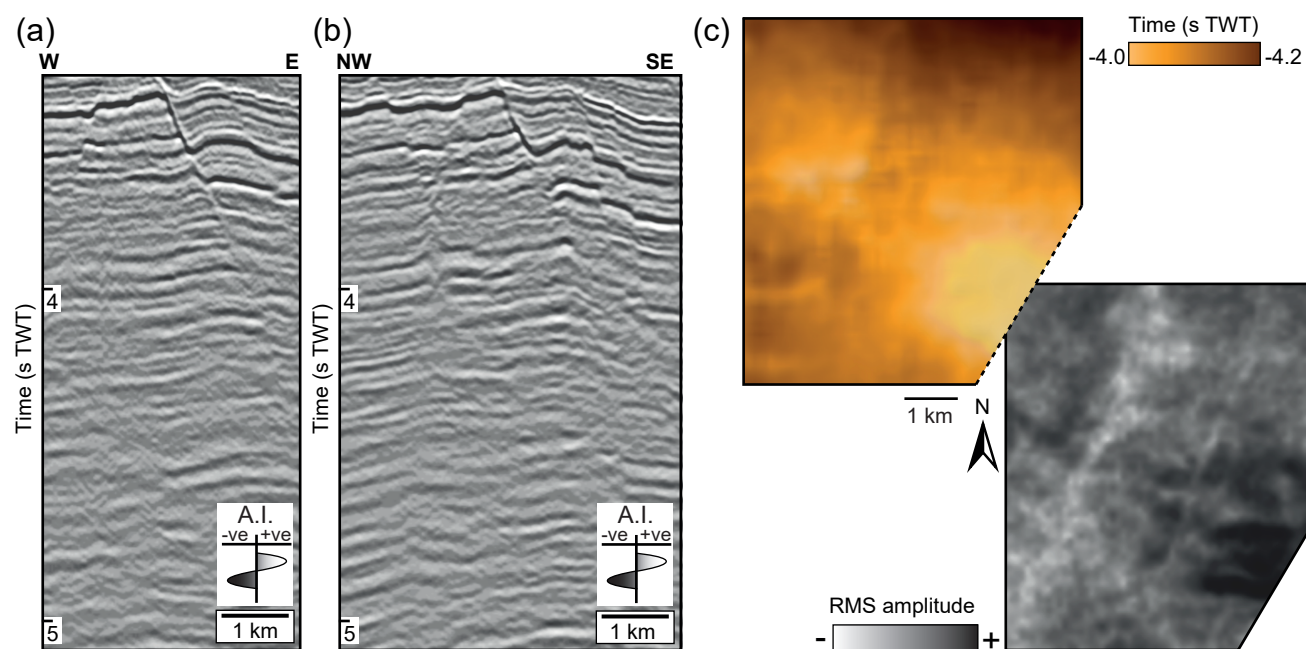

Supplementary Figure S6: Uninterpreted version of Figure 9A-C.

Supplement: Supplementary file 1 [file se-11-579-2020-supplement.zip]

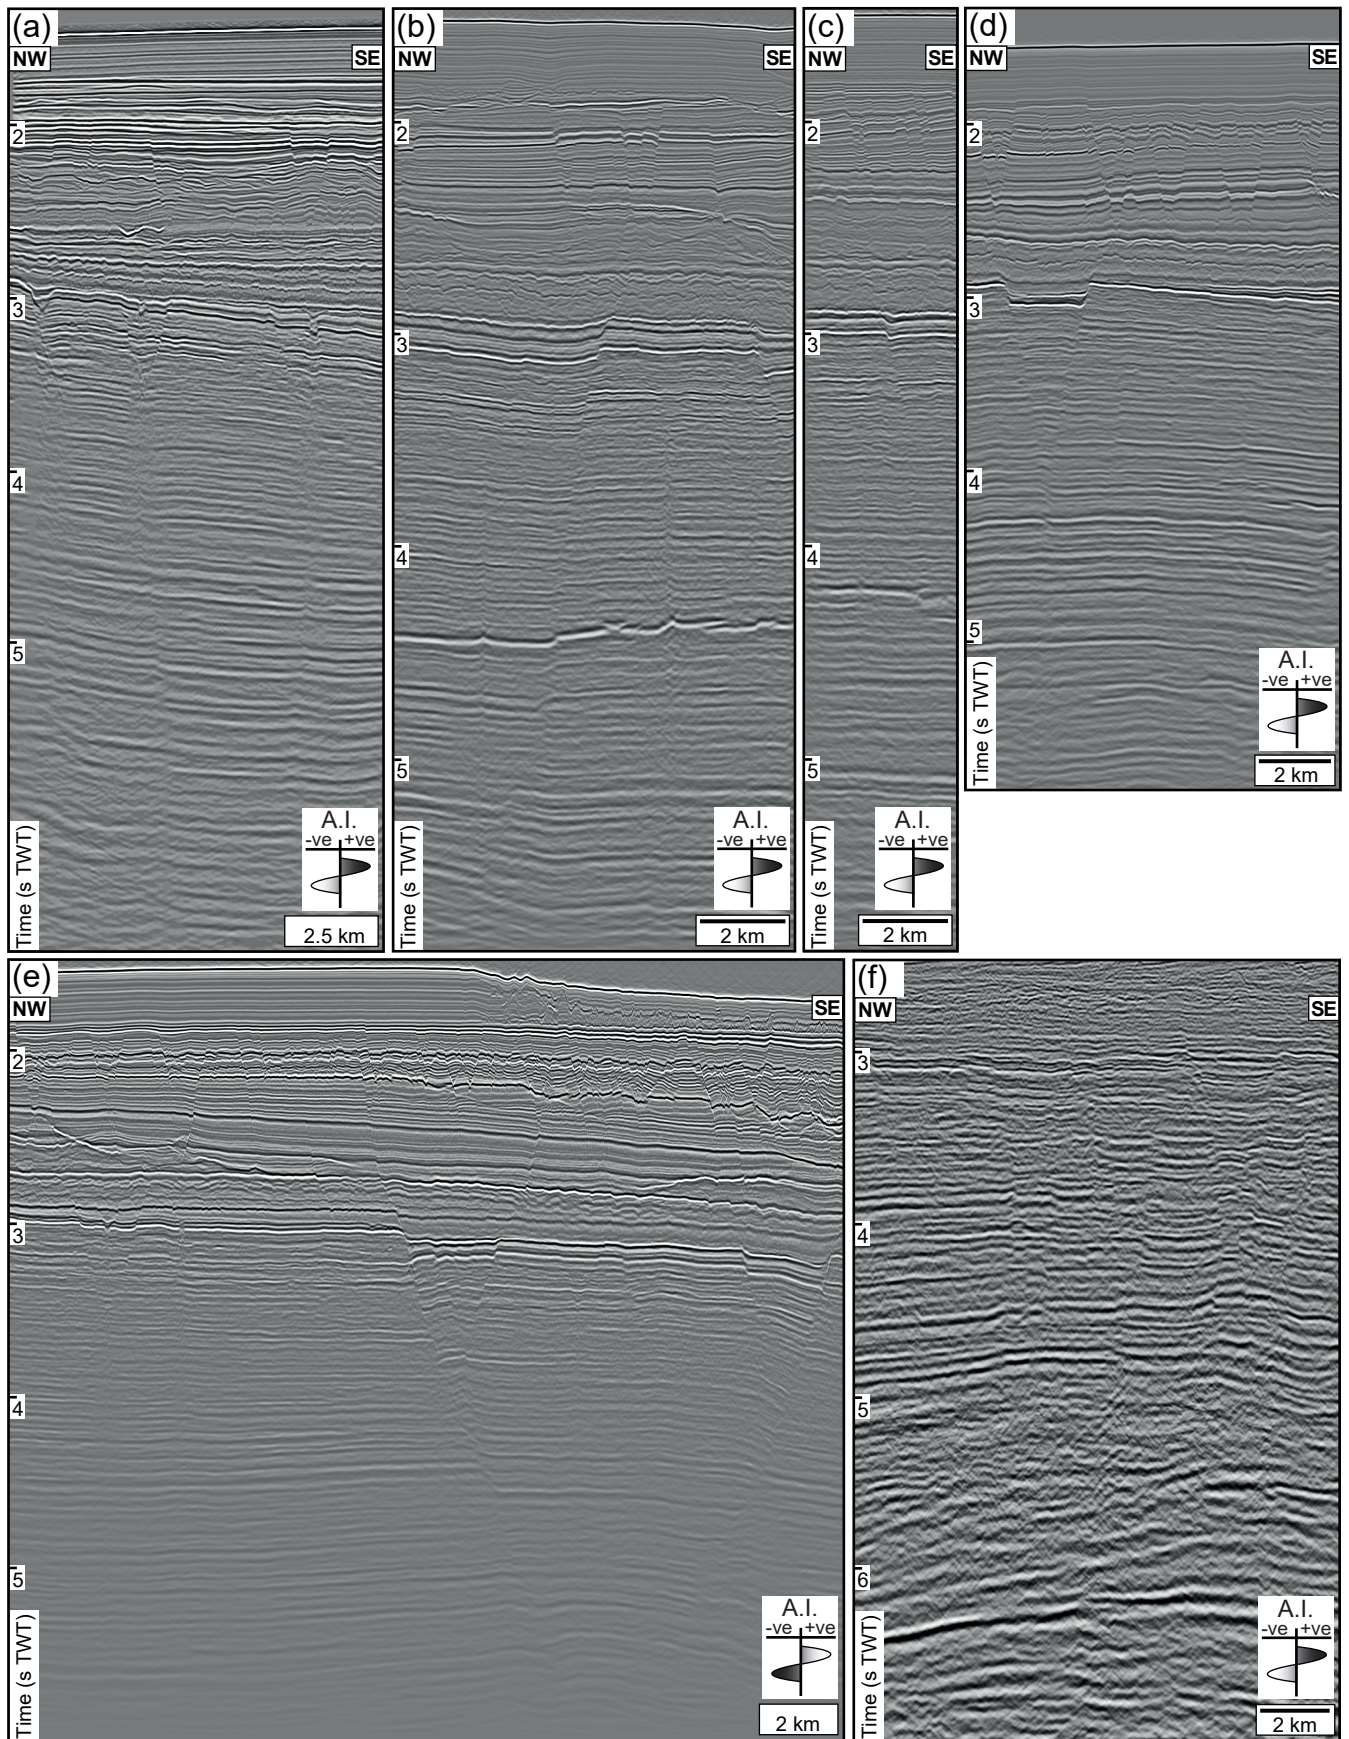

Supplementary Figure S4: Uninterpreted version of Figure 6.

Supplement: Supplementary file 2 [file se-11-579-2020-supplement.zip]

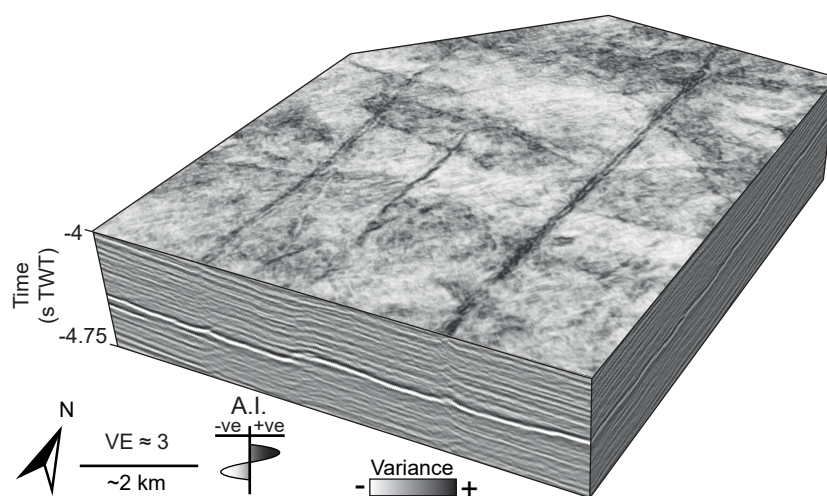

Supplementary Figure S2: Uninterpreted version of Figure 5.

Supplement: Supplementary file 3 [file se-11-579-2020-supplement.zip]

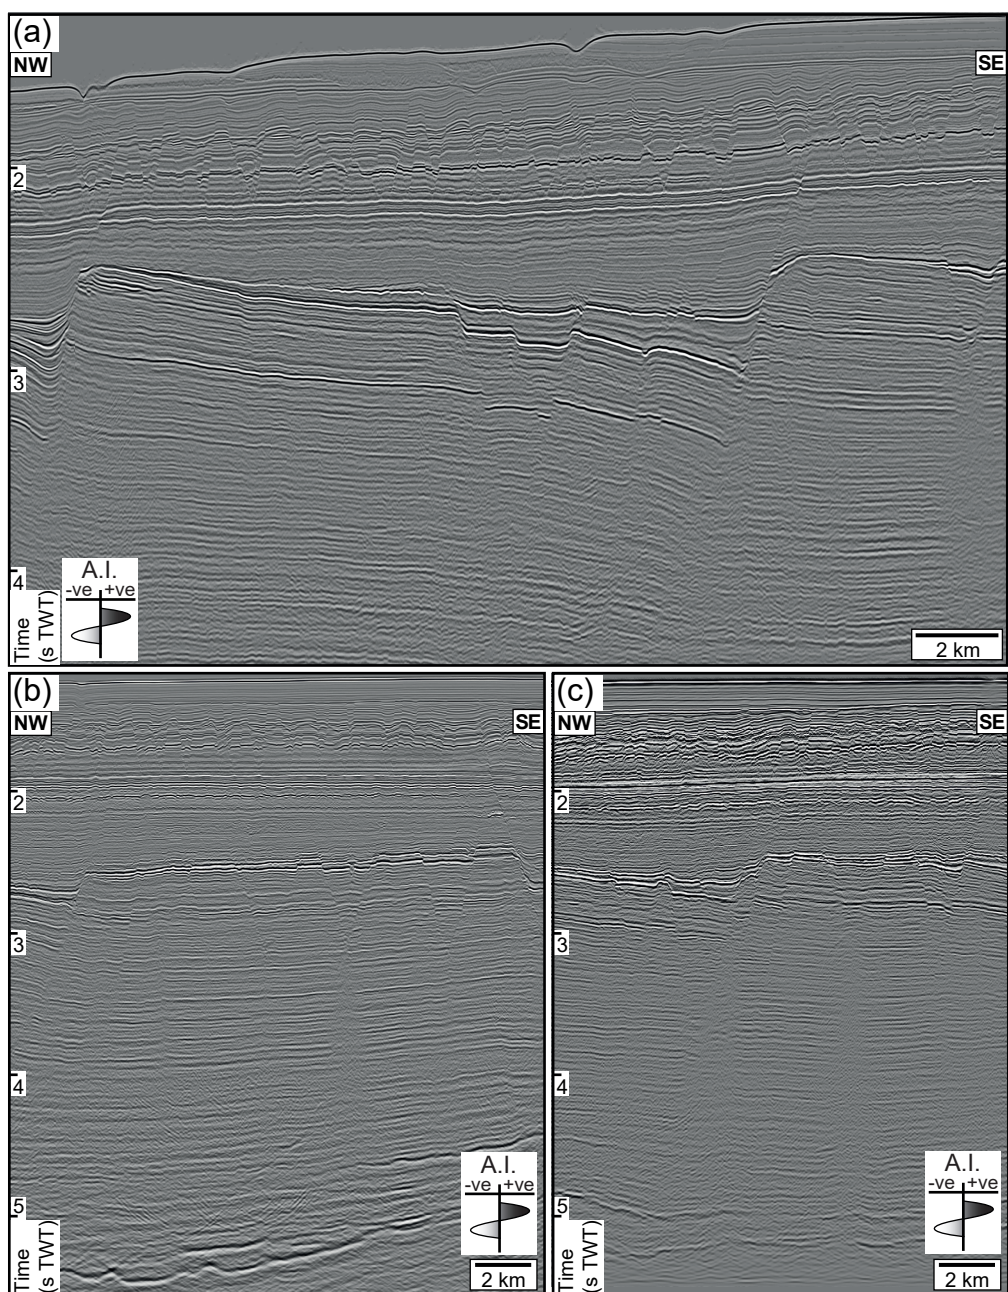

Supplementary Figure S5: Uninterpreted version of Figure 7.

Supplement: Supplementary file 4 [file se-11-579-2020-supplement.zip]

(c)

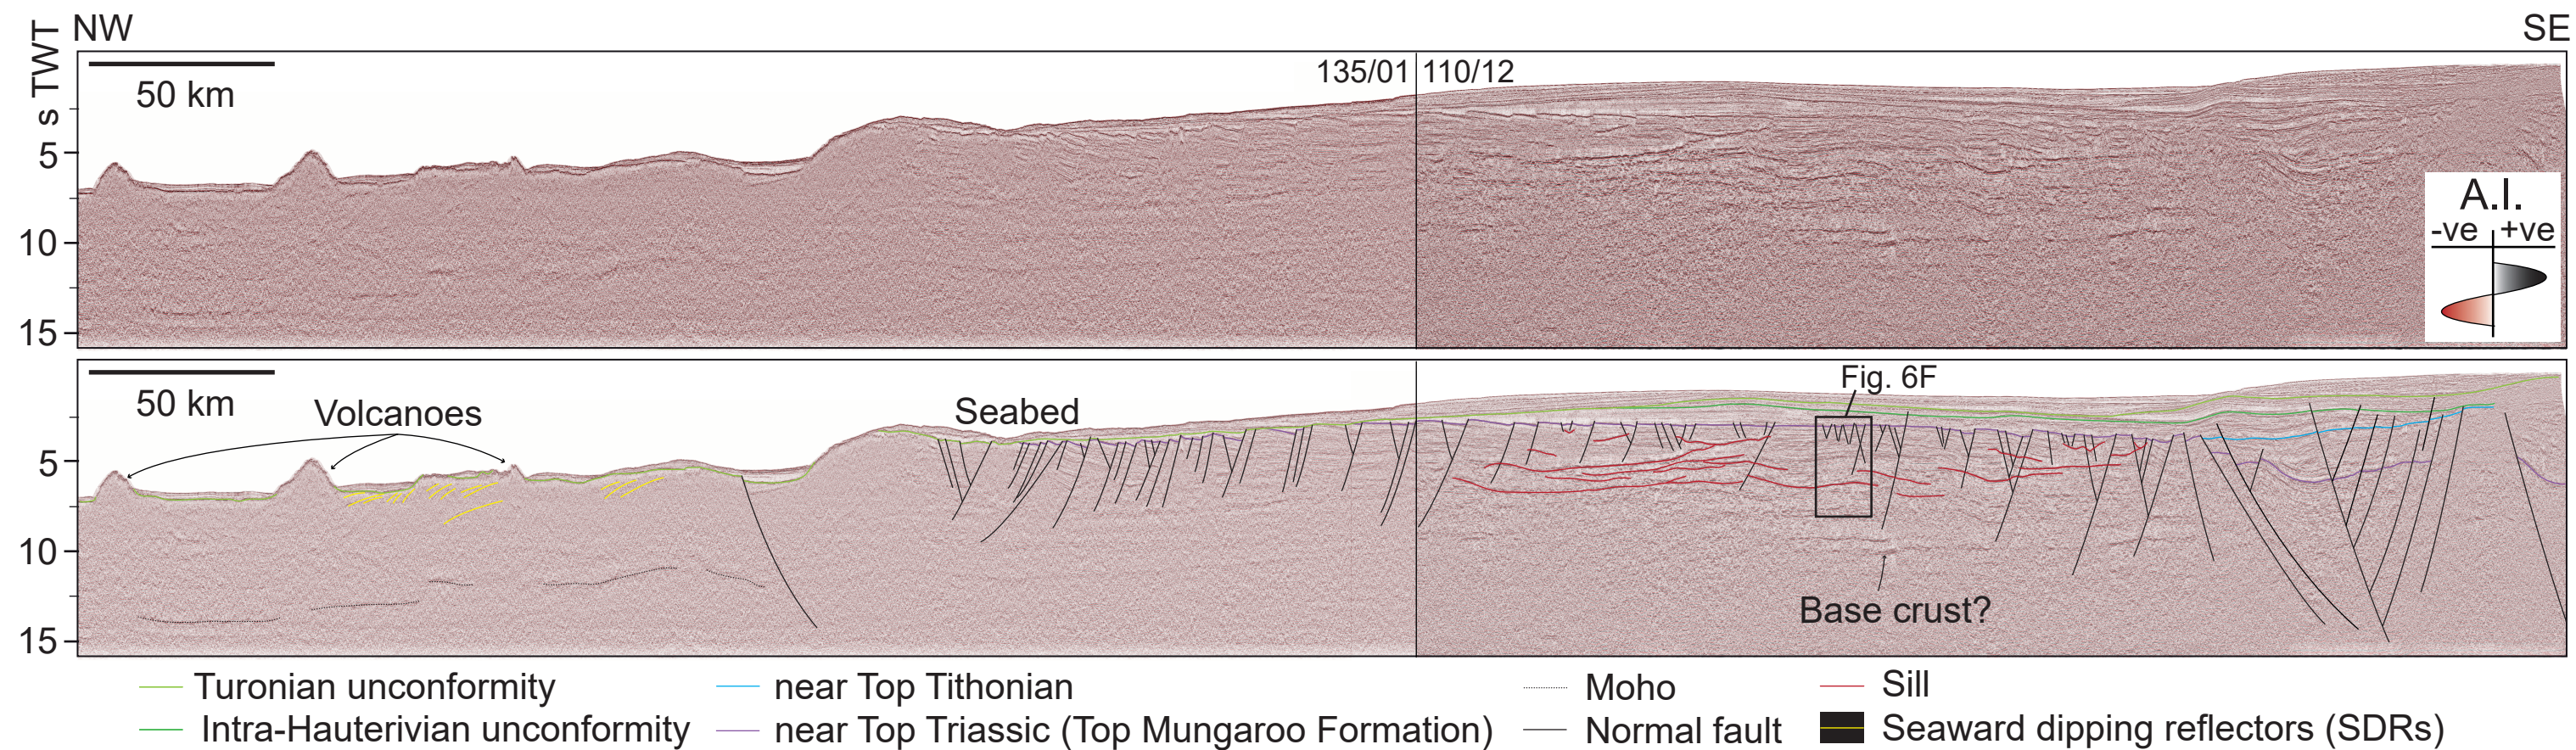

Supplement: Supplementary file 5 [file se-11-579-2020-supplement.zip]

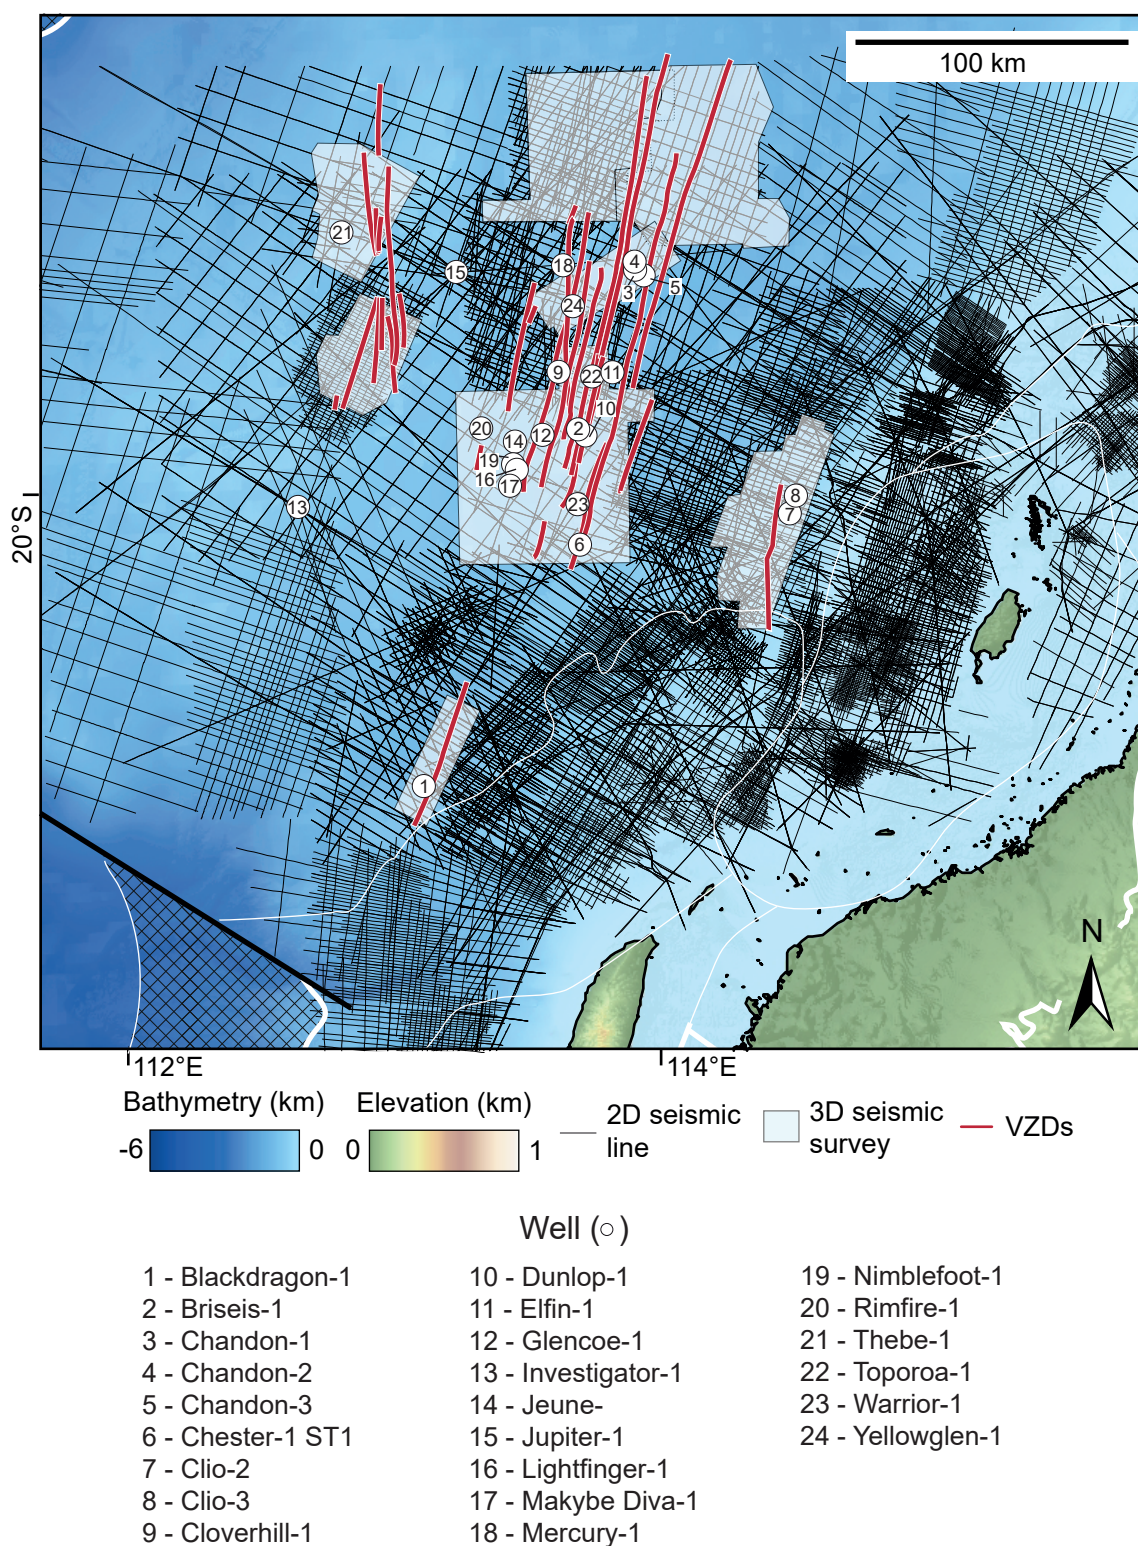

Supplementary Figure S1: Location map highlighting the 24 wells used.

Supplement: Supplementary file 8 [file se-11-579-2020-supplement.zip]
